# Supplementary material for: SUMOylation contributes to proteostasis of the chloroplast protein import receptor TOC159 during early development
Source: eLife. 2020 Dec 22;9:e60968. doi: 10.7554/eLife.60968 (PMC8497054; doi:10.7554/eLife.60968)
Supplement: Figure 2—source data 1. [file elife-60968-fig2-data1.xlsx]

## Sheet: Figure 2.C
	WT	GFP-TOC159GM:ppi2	GFP-TOC159GM-K/R:ppi2
Experiment 1	1.22	1.08	0.92
Experiment 2	1.12	1.12	0.98
Experiment 3	1.1	0.98	1.06
Experiment 4	1.09	0.91	1.16
Mean	1.1325	1.0225	1.03
SEM	0.03	0.048	0.052
	statistics: two-tailed t-test
				p-value
	WT	vs	GFP-TOC159GM:ppi2	0.0982
	WT	vs	GFP-TOC159GM-K/R:ppi2	0.138
	GFP-TOC159GM:ppi2		GFP-TOC159GM-K/R:ppi2	0.9188
