# Supplementary material for: SUMOylation contributes to proteostasis of the chloroplast protein import receptor TOC159 during early development
Source: eLife. 2020 Dec 22;9:e60968. doi: 10.7554/eLife.60968 (PMC8497054; doi:10.7554/eLife.60968)
Supplement: Figure 3—source data 1. [file elife-60968-fig3-data1.xlsx]

## Sheet: Figure 3B
	TOC159GM				TOC75				TOC33
	MS		MS+PAC		MS		MS+PAC		MS		MS+PAC
	GFP-TOC159GM:ppi2	GFP-TOC159GM-K/R:ppi2	GFP-TOC159GM:ppi2	GFP-TOC159GM-K/R:ppi2	GFP-TOC159GM:ppi2	GFP-TOC159GM-K/R:ppi2	GFP-TOC159GM:ppi2	GFP-TOC159GM-K/R:ppi2	GFP-TOC159GM:ppi2	GFP-TOC159GM-K/R:ppi2	GFP-TOC159GM:ppi2	GFP-TOC159GM-K/R:ppi2
Experiment 1	1	1.01	0.15	0.07	1	0.98	0.55	0.35	1	1.2	0.12	0.07
Experiment 2	1	0.98	0.18	0.06	1	1.01	0.78	0.52	1	1.23	0.16	0.09
Experiment 3	1	1.2	0.17	0.09	1	1.16	0.66	0.38	1	0.8	0.18	0.12
Mean	1	1.06	0.17	0.07	1	1.05	0.67	0.41	1	1.07	0.15	0.09
SEM	0	0.069	0.009	0.008	0	0.055	0.066	0.052	0	0.138	0.017	0.012
	statistics: two-tailed t-test
	MS+PAC			p-value
TOC159GM	GFP-TOC159GM:ppi2	vs	GFP-TOC159GM-K/R:ppi2	0.0017
TOC75	GFP-TOC159GM:ppi2	vs	GFP-TOC159GM-K/R:ppi2	0.0434
TOC33	GFP-TOC159GM:ppi2	vs	GFP-TOC159GM-K/R:ppi2	0.0398

## Sheet: Figure 3E
	TOC159GM
	PAC+without MG132		PAC+with MG132
	GFP-TOC159GM:ppi2	GFP-TOC159GM-K/R:ppi2	GFP-TOC159GM:ppi2	GFP-TOC159GM-K/R:ppi2
Experiment 1	1	0.31	1.67	2.59
Experiment 2	1	0.46	2.16	2.24
Experiment 3	1	0.66	1.87	1.59
Mean	1	0.47	1.9	2.14
SEM	0	0.101	0.142	0.292
	statistics: two-tailed t-test
	PAC+without MG132			p-value
TOC159GM	GFP-TOC159GM:ppi2	vs	GFP-TOC159GM-K/R:ppi2	0.0067
	PAC+with MG132			p-value
TOC159GM	GFP-TOC159GM:ppi2	vs	GFP-TOC159GM-K/R:ppi2	0.5021

## Sheet: Figure S4
	RGL2
	GFP-TOC159GM:ppi2	GFP-TOC159GM-K/R:ppi2
Experiment 1	1	1.08
Experiment 2	1	0.96
Experiment 3	1	0.98
Mean	1	1007
SEM	0	0.037
	statistics: two-tailed t-test
	MS+PAC			p-value
RGL2	GFP-TOC159GM:ppi2	vs	GFP-TOC159GM-K/R:ppi2	0.08662

## Sheet: Figure S5
	TOC159GM				TOC75				TOC33				PSBA				PSBO1				RBCL				RBCS				PETC				PSAD				ATPase				LHCB2
	MS		MS+PAC		MS		MS+PAC		MS		MS+PAC		MS		MS+PAC		MS		MS+PAC		MS		MS+PAC		MS		MS+PAC		MS		MS+PAC		MS		MS+PAC		MS		MS+PAC		MS		MS+PAC
	GFP-TOC159GM:ppi2	GFP-TOC159GM-K/R:ppi2	GFP-TOC159GM:ppi2	GFP-TOC159GM-K/R:ppi2	GFP-TOC159GM:ppi2	GFP-TOC159GM-K/R:ppi2	GFP-TOC159GM:ppi2	GFP-TOC159GM-K/R:ppi2	GFP-TOC159GM:ppi2	GFP-TOC159GM-K/R:ppi2	GFP-TOC159GM:ppi2	GFP-TOC159GM-K/R:ppi2	GFP-TOC159GM:ppi2	GFP-TOC159GM-K/R:ppi2	GFP-TOC159GM:ppi2	GFP-TOC159GM-K/R:ppi2	GFP-TOC159GM:ppi2	GFP-TOC159GM-K/R:ppi2	GFP-TOC159GM:ppi2	GFP-TOC159GM-K/R:ppi2	GFP-TOC159GM:ppi2	GFP-TOC159GM-K/R:ppi2	GFP-TOC159GM:ppi2	GFP-TOC159GM-K/R:ppi2	GFP-TOC159GM:ppi2	GFP-TOC159GM-K/R:ppi2	GFP-TOC159GM:ppi2	GFP-TOC159GM-K/R:ppi2	GFP-TOC159GM:ppi2	GFP-TOC159GM-K/R:ppi2	GFP-TOC159GM:ppi2	GFP-TOC159GM-K/R:ppi2	GFP-TOC159GM:ppi2	GFP-TOC159GM-K/R:ppi2	GFP-TOC159GM:ppi2	GFP-TOC159GM-K/R:ppi2	GFP-TOC159GM:ppi2	GFP-TOC159GM-K/R:ppi2	GFP-TOC159GM:ppi2	GFP-TOC159GM-K/R:ppi2	GFP-TOC159GM:ppi2	GFP-TOC159GM-K/R:ppi2	GFP-TOC159GM:ppi2	GFP-TOC159GM-K/R:ppi2
Experiment 1	0	0.97	0.18	0.1	1	0.92	0.67	0.42	1	1.3	0.54	0.3	1	1.11	0.51	0.38	1	1.3	0.35	0.33	1	1.06	0.49	0.38	1	0.92	0.65	0.53	1	0.92	0.67	0.55	1	0.96	0.74	0.68	1	1.04	0.62	0.68	1	1.2	0.92	0.96
Experiment 2	1	0.88	0.25	0.12	1	0.87	0.68	0.43	1	0.97	0.47	0.26	1	0.84	0.65	0.53	1	0.85	0.54	0.55	1	1.2	0.4	0.42	1	1.12	0.65	0.7	1	0.94	0.55	0.62	1	1.24	0.82	0.78	1	0.92	0.75	0.62	1	0.92	0.87	0.69
Experiment 3	1	0.92	0.2	0.08	1	0.98	0.62	0.54	1	1	0.6	0.41	1	0.85	0.38	0.33	1	0.77	0.59	0.49	1	1.12	0.48	0.46	1	1.08	0.72	0.64	1	1.18	0.61	0.47	1	1.05	0.72	0.62	1	0.99	0.68	0.61	1	1.1	0.78	0.81
Mean	1	0.92	0.21	0.1	1	0.92	0.65	0.46	1	1.09	0.53	0.32	1	0.93	0.51	0.41	1	0.97	0.49	0.45	1	1.12667	0.456667	0.42	1	1.04	0.673333	0.623333	1	1.01333	0.61	0.546667	1	1.08333	0.76	0.693333	1	0.983333	0.683333	0.636667	1	1.07	0.857	0.82
SEM	0	0.026	0.02	0.011	0	0.031	0.018	0.038	0	0.105	0.037	0.044	0	0.088	0.077	0.06	0	0.164	0.073	0.065	0	0.0405518	0.02848	0.023094	0	0.061101	0.0233333	0.0497773	0	0.0835331	0.034641	0.0433333	0	0.0825295	0.0305505	0.0466667	0	0.034801	0.0375648	0.0218581	0	0.082	0.041	0.078
	statistics: two-tailed t-test
	MS+PAC			p-value
TOC159GM	GFP-TOC159GM:ppi2	vs	GFP-TOC159GM-K/R:ppi2	0.0099
TOC75	GFP-TOC159GM:ppi2	vs	GFP-TOC159GM-K/R:ppi2	0.0106
TOC33	GFP-TOC159GM:ppi2	vs	GFP-TOC159GM-K/R:ppi2	0.0218
PSBA	GFP-TOC159GM:ppi2	vs	GFP-TOC159GM-K/R:ppi2	0.3671
PSBO1	GFP-TOC159GM:ppi2	vs	GFP-TOC159GM-K/R:ppi2	0.728
RBSL	GFP-TOC159GM:ppi2	vs	GFP-TOC159GM-K/R:ppi2	0.3739
RBCS	GFP-TOC159GM:ppi2	vs	GFP-TOC159GM-K/R:ppi2	0.4115
PETC	GFP-TOC159GM:ppi2	vs	GFP-TOC159GM-K/R:ppi2	0.3173
PSAD	GFP-TOC159GM:ppi2	vs	GFP-TOC159GM-K/R:ppi2	0.298
ATPase	GFP-TOC159GM:ppi2	vs	GFP-TOC159GM-K/R:ppi2	0.3434
LHCB2	GFP-TOC159GM:ppi2	vs	GFP-TOC159GM-K/R:ppi2	0.6989
