# Supplementary material for: SUMOylation contributes to proteostasis of the chloroplast protein import receptor TOC159 during early development
Source: eLife journal article supplement (doi:10.7554/elife.60968), 2020-12-22
Supplement: supp [file elife-60968-supp-v1.zip]

**A**

| Position | Peptide         | Score  | Cutoff | P- value | Type                     |
|----------|-----------------|--------|--------|----------|--------------------------|
| 1300     | TVQVTKDKKEFNIHL | 6.009  | 4.866  | 0.049    | Sumoylation Nonconcensus |
| 1370     | ENIATGVKLEDQIAL | 11.573 | 3.24   | 0.01     | Sumoylation Concensus    |

**B**

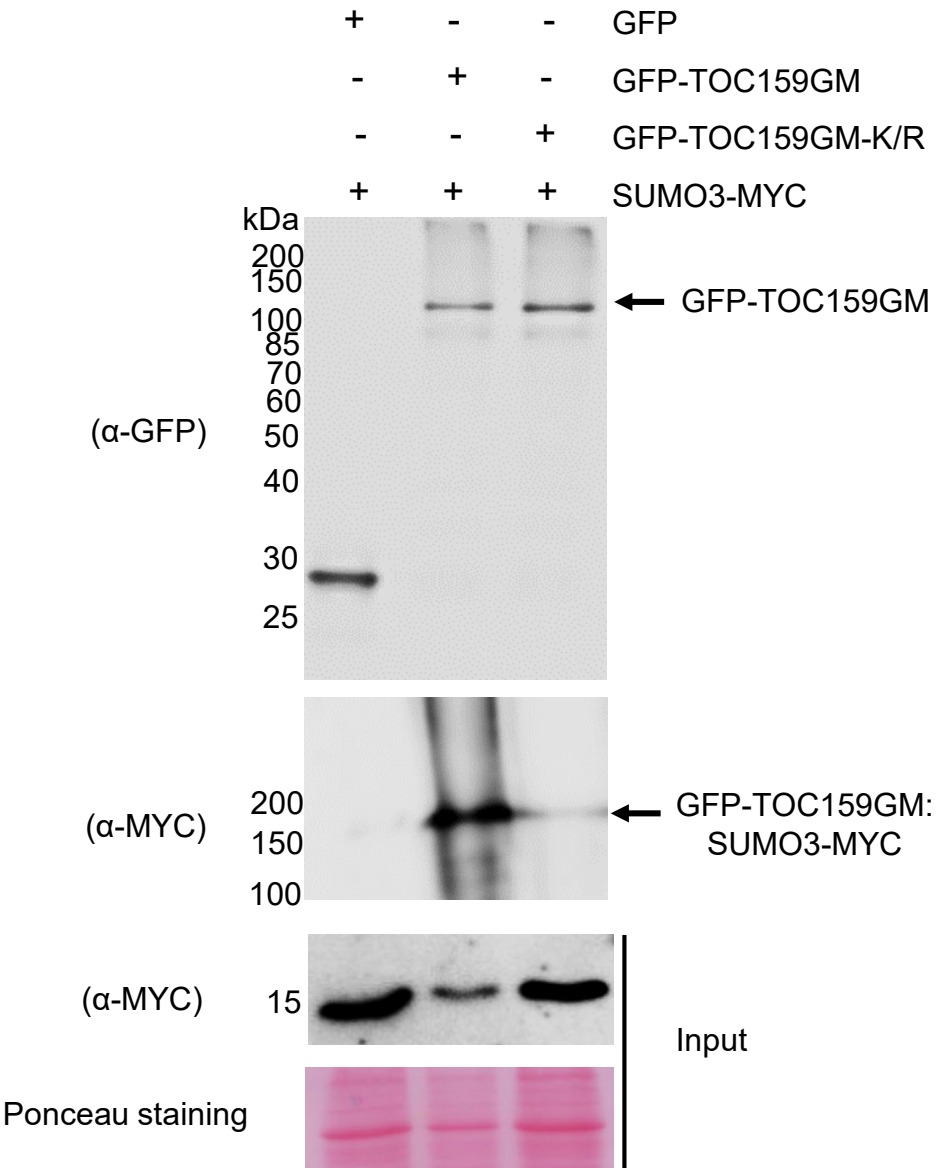

**Fig. S1.2**
