# Supplementary figures and images for: SUMOylation contributes to proteostasis of the chloroplast protein import receptor TOC159 during early development
Source: eLife journal article supplement (doi:10.7554/elife.60968), 2020-12-22

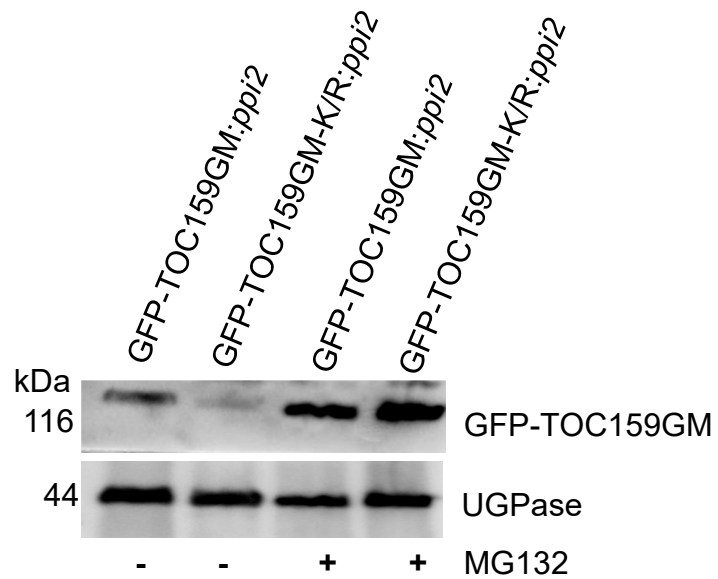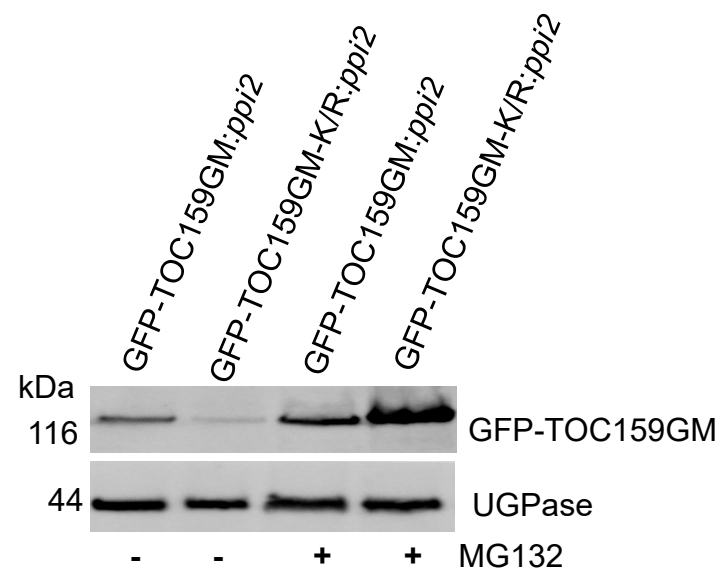

**Fig. S3.4**

Supplement: supp [file elife-60968-supp-v1.zip]

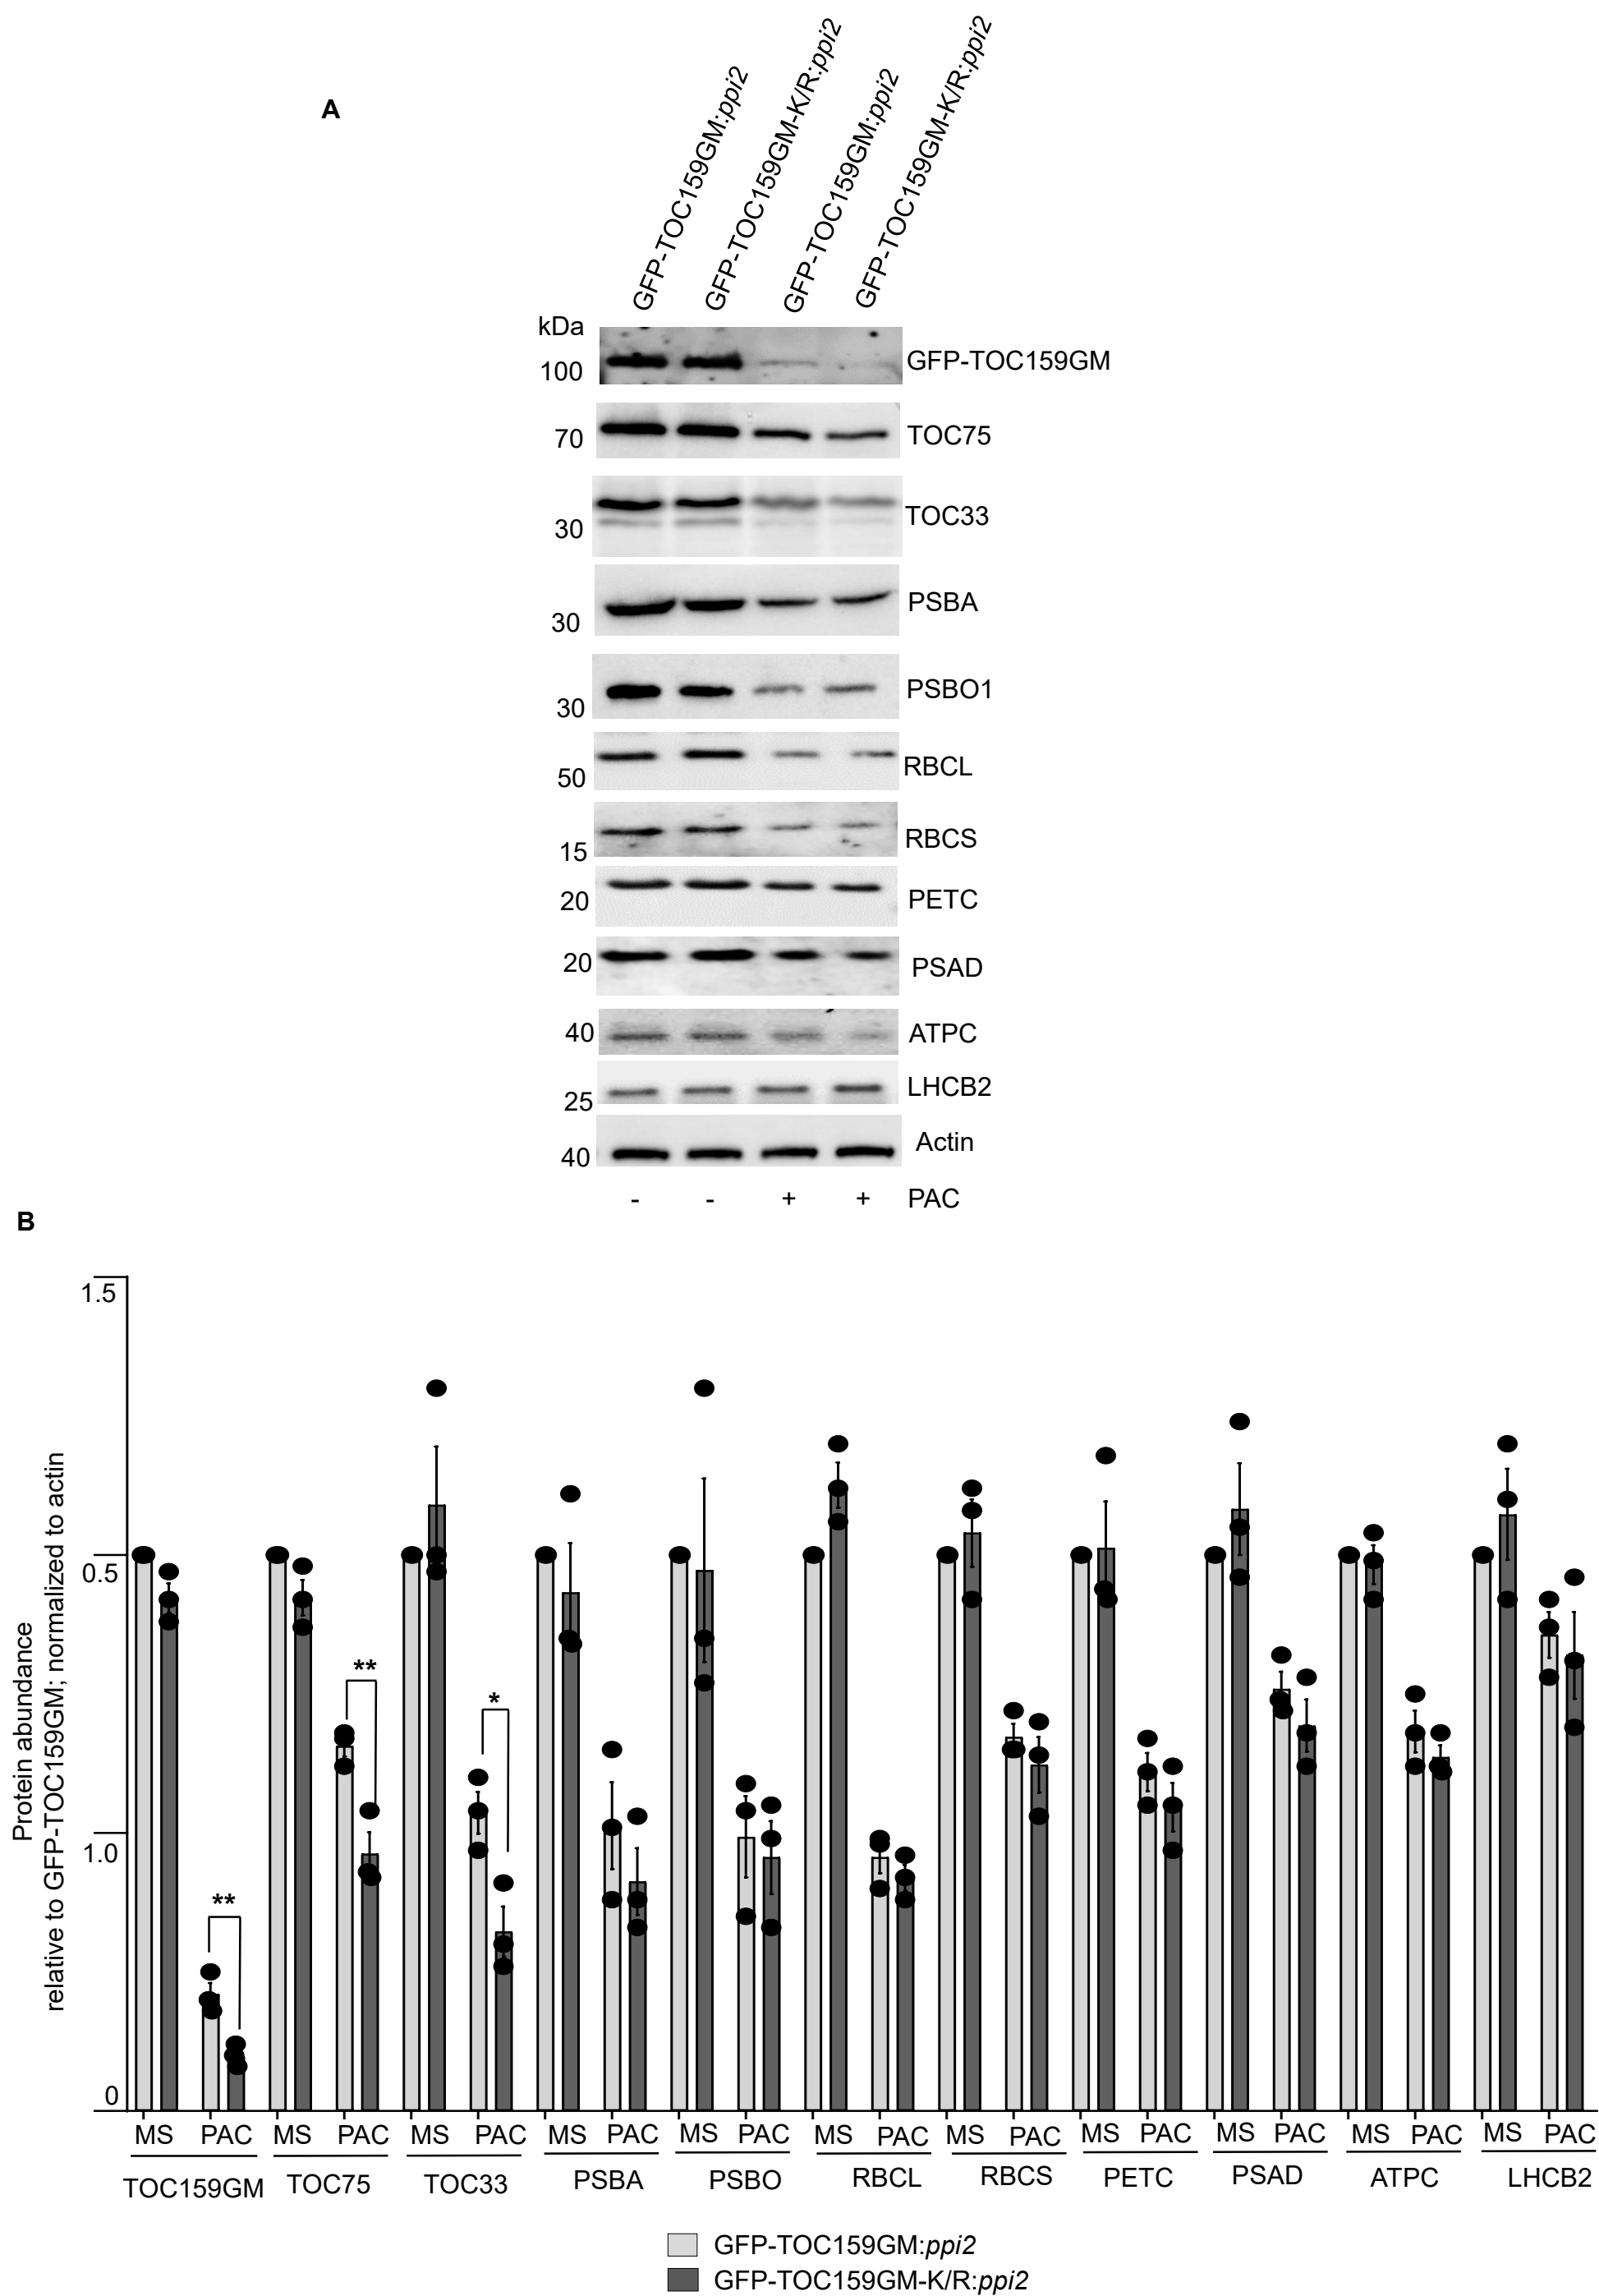

**Fig. S3.5**

Supplement: supp [file elife-60968-supp-v1.zip]

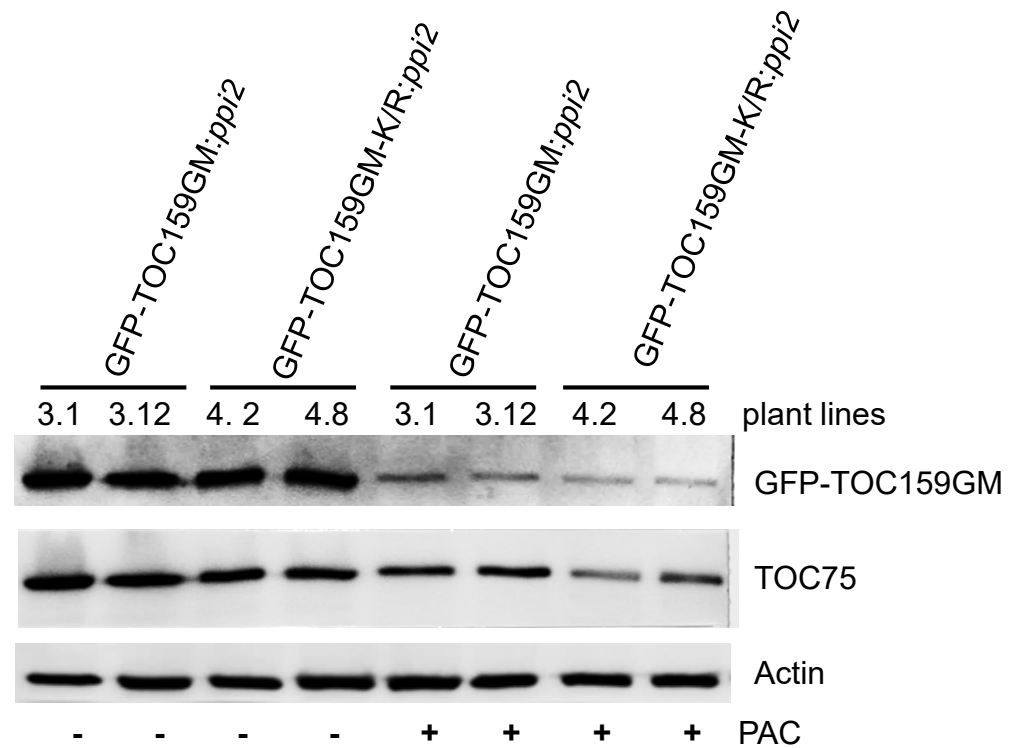

**Fig. S3.1**

Supplement: supp [file elife-60968-supp-v1.zip]

**A**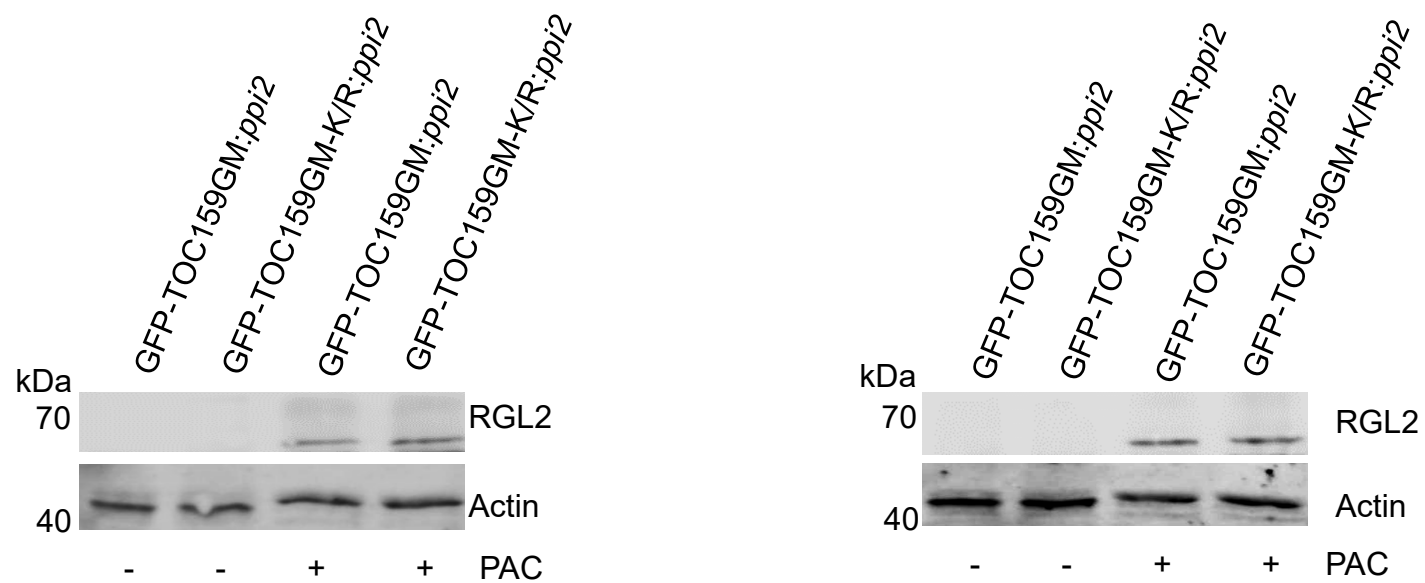**B**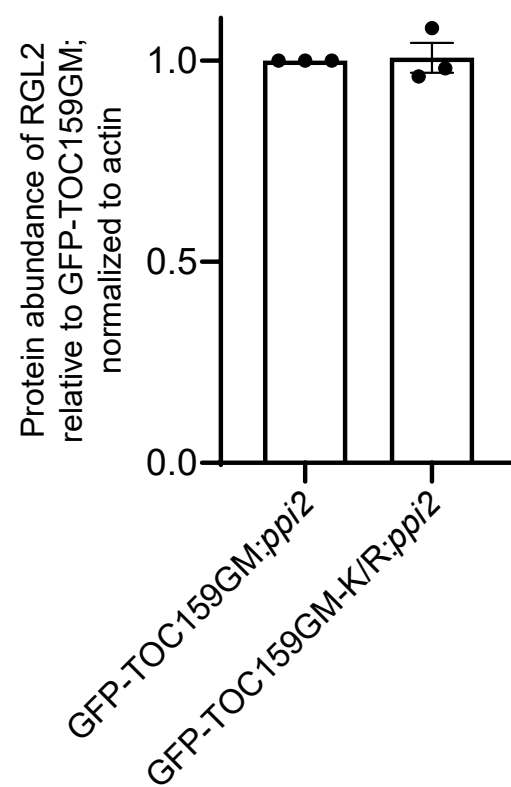**Fig. S3.3**

Supplement: supp [file elife-60968-supp-v1.zip]

**A**

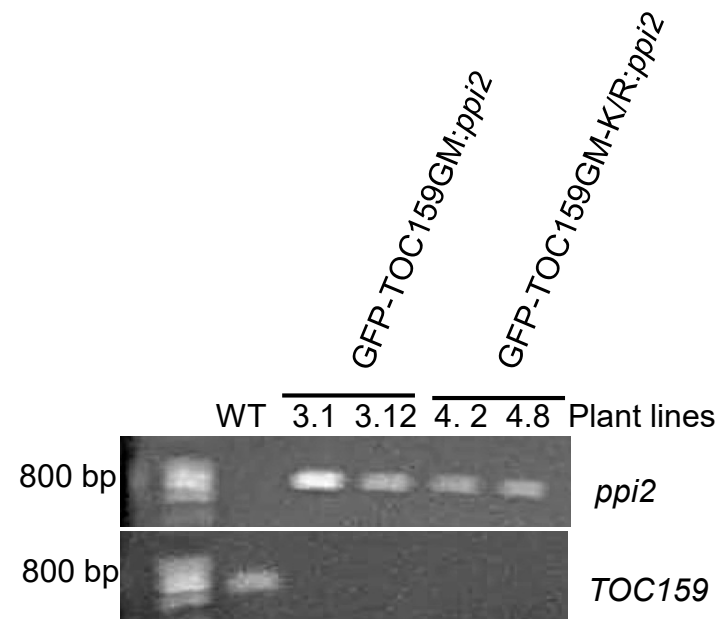

**B**

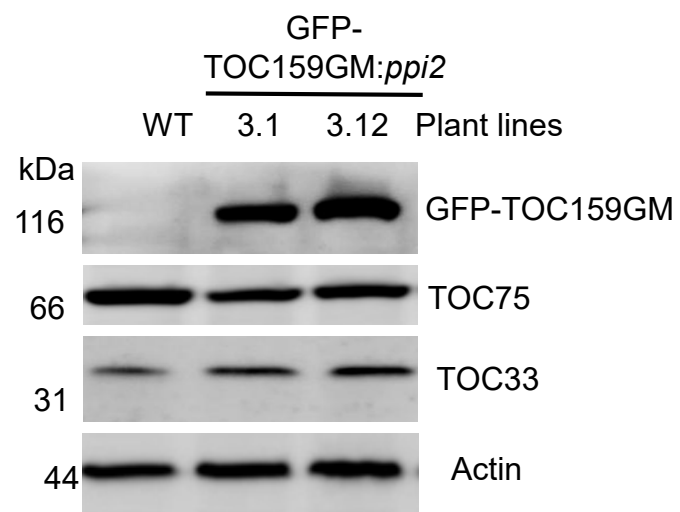

**C**

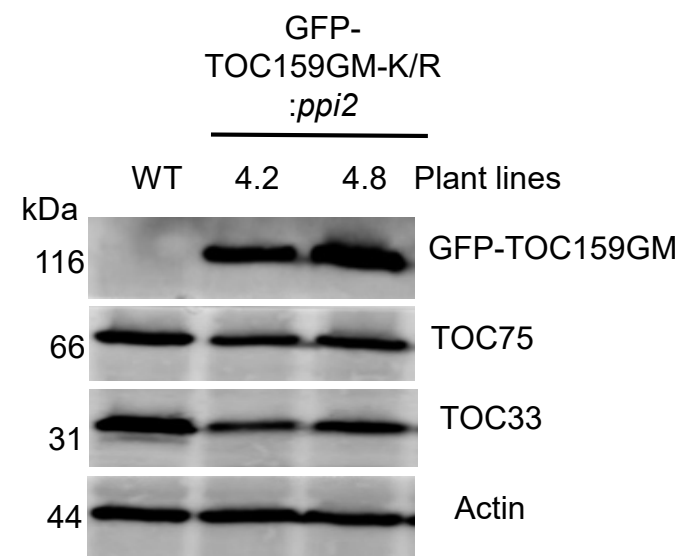

**Fig. S2.1**

Supplement: supp [file elife-60968-supp-v1.zip]

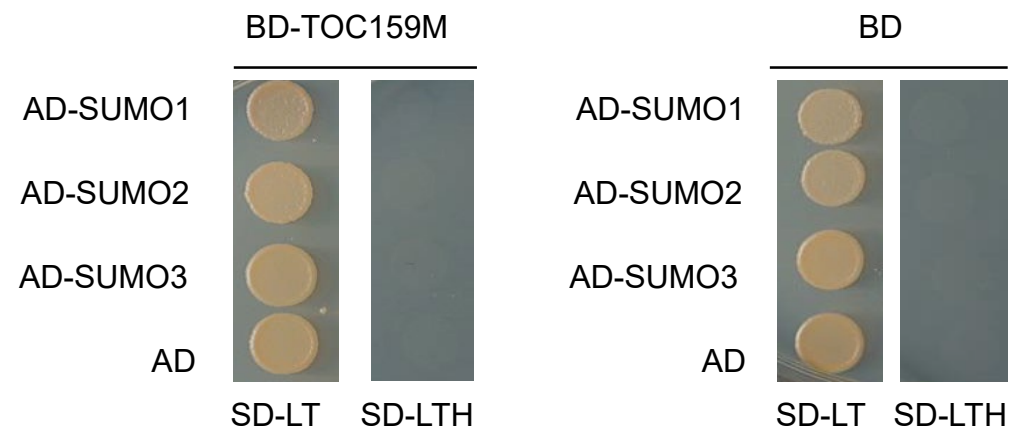

**Fig. S1.1**

Supplement: supp [file elife-60968-supp-v1.zip]

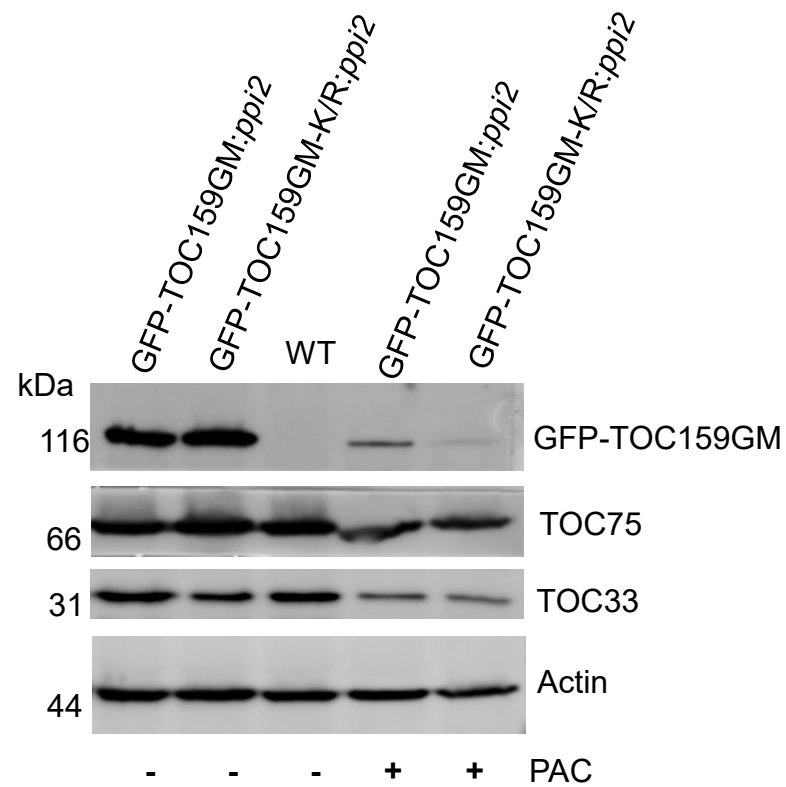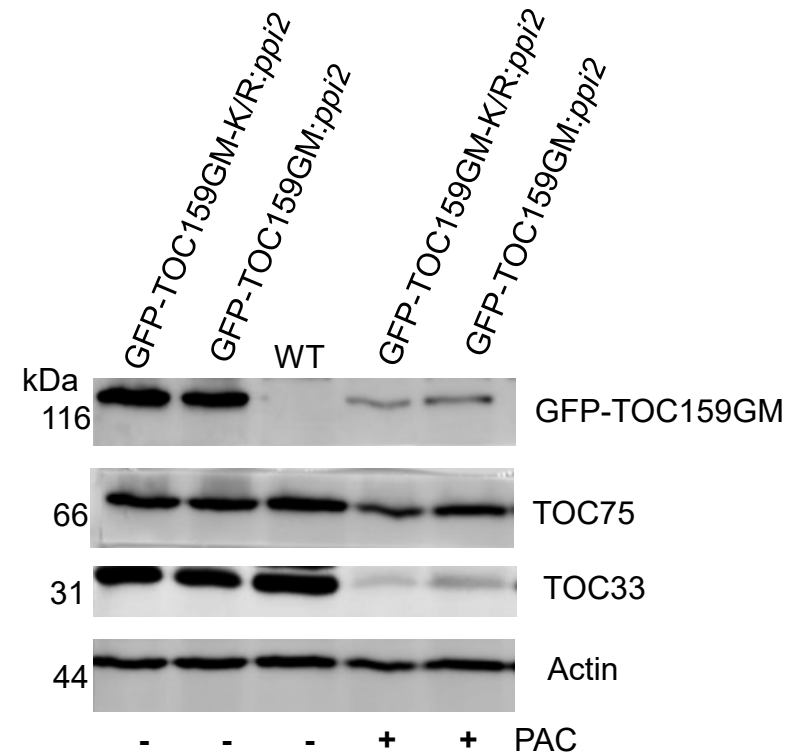

Fig. S3.2

Supplement: supp [file elife-60968-supp-v1.zip]
